# Supplementary material
Source: HighWire-hosted journal article supplement (https://bmjopen.bmj.com/content/10/11/e037737)
Supplement: inline-supplementary-material-17 [file inline-supplementary-material-17.pdf]

| MRC score for ARDS patients                        |                                          |                                                                                                       |                             |                                 |                                         |          |
|----------------------------------------------------|------------------------------------------|-------------------------------------------------------------------------------------------------------|-----------------------------|---------------------------------|-----------------------------------------|----------|
| Patient or population: patients with ARDS patients |                                          |                                                                                                       |                             |                                 |                                         |          |
| Settings:                                          |                                          |                                                                                                       |                             |                                 |                                         |          |
| Intervention: MRC score                            |                                          |                                                                                                       |                             |                                 |                                         |          |
| Outcomes                                           | Illustrative comparative risks* (95% CI) |                                                                                                       | Relative effect<br>(95% CI) | No of Participants<br>(studies) | Quality of the evidence<br>(GRADE)      | Comments |
|                                                    | Assumed risk                             | Corresponding risk                                                                                    |                             |                                 |                                         |          |
|                                                    | Control                                  | MRC score                                                                                             |                             |                                 |                                         |          |
| MRC score                                          |                                          | The mean mrc score in the intervention groups was<br><b>2.24 lower</b><br>(6.24 lower to 1.76 higher) |                             | 1345<br>(2 studies)             | ⊕ ⊕ ⊕ ⊖<br><b>moderate</b> <sup>1</sup> |          |
| APECHE II                                          |                                          | The mean apeche ii in the intervention groups was<br><b>2.07 lower</b><br>(3.17 to 0.97 lower)        |                             | 137<br>(2 studies)              | ⊕ ⊕ ⊕ ⊖<br><b>moderate</b> <sup>2</sup> |          |

\*The basis for the **assumed risk** (e.g. the median control group risk across studies) is provided in footnotes. The **corresponding risk** (and its 95% confidence interval) is based on the assumed risk in the comparison group and the **relative effect** of the intervention (and its 95% CI).

CI: Confidence interval;  
GRADE Working Group grades of evidence

**High quality:** Further research is very unlikely to change our confidence in the estimate of effect.

**Moderate quality:** Further research is likely to have an important impact on our confidence in the estimate of effect and may change the estimate.

**Low quality:** Further research is very likely to have an important impact on our confidence in the estimate of effect and is likely to change the estimate.

**Very low quality:** We are very uncertain about the estimate.

\*Differences between results

---

<sup>2</sup> No more than 100 patients were enrolled in either study

---

*Supplemental Table.6 GRADE system: MRC score and APACHE II score*
